# Supplementary material for: Impact of the COVID-19 pandemic on gastrointestinal endoscopy in Africa
Source: PubMed Central journal article supplement — Endosc Int Open. 2020 Aug 7;8(8):E1097–101. doi: 10.1055/a-1210-4274 (PMC7413826; doi:10.1055/a-1210-4274), 2020-08-07
Supplement: 1986supmat-10-1055-a-1210-4274.pdf [file 1986supmat-10-1055-a-1210-4274.pdf]

## Appendix 1: survey

| General questions                                                                    |                                                                                                                                                                                                                   |
|--------------------------------------------------------------------------------------|-------------------------------------------------------------------------------------------------------------------------------------------------------------------------------------------------------------------|
| Did you scope any patient with confirmed or suspected COVID-19?                      | Yes / No                                                                                                                                                                                                          |
| If yes, what were the main indications for the examination?                          | Open answer                                                                                                                                                                                                       |
| Did/does your hospital treat patients with COVID-19?                                 | Yes / No                                                                                                                                                                                                          |
| Do you feel there is an underreporting or underdiagnoses of COVID-19 in your region? | Yes / No                                                                                                                                                                                                          |
| Do you feel COVID-19 can be transmitted to the physician during endoscopy?           | Yes / No                                                                                                                                                                                                          |
| Changes to endoscopic activity                                                       |                                                                                                                                                                                                                   |
| Did you triage patients differently in your center due to the pandemic?              | Yes / No                                                                                                                                                                                                          |
| What kind of procedures did you continue doing:                                      | a. Emergency<br>b. Urgent<br>c. Elective<br>d. All of the above                                                                                                                                                   |
| Approximately what percentage of procedures were cancelled or postponed?             | No reduction<br>25-50%<br>50-75%<br>75-100%                                                                                                                                                                       |
| Was there a time frame for the cancellation/postponement of procedures?              | <4 weeks<br>>4 weeks<br>Indefinite                                                                                                                                                                                |
| How much did endoscopy reduce in total in your center?                               | No reduction<br>25-50%<br>50-75%<br>75-100% (stopped completely)                                                                                                                                                  |
| Pre-endoscopy screening measures                                                     |                                                                                                                                                                                                                   |
| Do you screen patients prior to endoscopy during the pandemic?                       | Yes / No                                                                                                                                                                                                          |
| What form of pre-endoscopy screening do you use?                                     | a. Questions and history<br>b. Clinical exam<br>c. Temperature check<br>c. PCR-test<br>d. Chest x-ray<br>(multiple answers possible)                                                                              |
| Personal Protective Equipment (PPE)                                                  |                                                                                                                                                                                                                   |
| Did your PPE regulations change during the pandemic?                                 | Yes / No                                                                                                                                                                                                          |
| What PPE is available in your center for scoping of confirmed or suspected COVID-19? | a. Surgical mask<br>b. N95/FFP2-3 respirator<br>c. Gloves, single pair<br>d. Gloves double pair<br>e. Hairnet<br>f. Goggles or face-shield<br>g. Long-sleeved water-resistant gown<br>(Multiple answers possible) |

|                                                                                                    |                                                                                                                                                                                                                                                                                                                                |
|----------------------------------------------------------------------------------------------------|--------------------------------------------------------------------------------------------------------------------------------------------------------------------------------------------------------------------------------------------------------------------------------------------------------------------------------|
| For which patients did you change your PPE during the pandemic?                                    | a. For all patients<br>b. For confirmed COVID cases<br>c. For suspected COVID cases                                                                                                                                                                                                                                            |
| Were family members allowed access into the endoscopy unit during the pandemic?                    | Yes / No                                                                                                                                                                                                                                                                                                                       |
| What was the most limited PPE during the pandemic?                                                 | a. Surgical mask<br>b. N95/FFP2-3 respirator<br>c. Gloves, single pair<br>d. Gloves double pair<br>e. Hairnet<br>f. Goggles or face-shield<br>g. Long-sleeved water-resistant gown                                                                                                                                             |
| Did you reuse PPE?                                                                                 | Yes / No                                                                                                                                                                                                                                                                                                                       |
| What were your reuse strategies?                                                                   | Open answers                                                                                                                                                                                                                                                                                                                   |
| Does your endoscopy unit have a negative-pressure room for scoping of COVID cases?                 | Yes / No                                                                                                                                                                                                                                                                                                                       |
| Did your center dedicate a specific area for scoping of confirmed or suspected COVID cases?        | Yes / No                                                                                                                                                                                                                                                                                                                       |
| <b>Handling of endoscopes during the pandemic</b>                                                  |                                                                                                                                                                                                                                                                                                                                |
| Did you change your disinfection or cleaning protocol during the pandemic?                         | Yes / No                                                                                                                                                                                                                                                                                                                       |
| If yes, please specify                                                                             | Open answer                                                                                                                                                                                                                                                                                                                    |
| Any change in protection of cleaning personnel during the pandemic?                                | Yes / No                                                                                                                                                                                                                                                                                                                       |
| <b>Return strategy after COVID</b>                                                                 |                                                                                                                                                                                                                                                                                                                                |
| Is your center already considering changing back to normalcy due to reduction in COVID infections? | Yes / No                                                                                                                                                                                                                                                                                                                       |
| Do you have a return-to-normal strategy?                                                           | Yes / No                                                                                                                                                                                                                                                                                                                       |
| What is your return-to-normal strategy?                                                            | a. No change because COVID did not affect our center<br>b. Continue with our present COVID strategy<br>c. Return to normal but with surgical masks for all procedures<br>d. Return to normal but with prescreening procedures and risk stratification of patients<br>e. Others – please specify<br>(multiple answers possible) |

## Appendix 2: results

### I. Responses of participants from Africa:

#### 1. Before the COVID pandemic, what was the total number of patients scoped in your centre per month?

| Answer Choices | Responses   |           |
|----------------|-------------|-----------|
| < 100          | 52,94%      | 18        |
| 100-200        | 23,53%      | 8         |
| 200-300        | 2,94%       | 1         |
| > 300          | 20,59%      | 4         |
|                | <b>100%</b> | <b>31</b> |

#### 2. Have you scoped patients with confirmed or suspected COVID-19?

| Answer Choices | Responses   |           |
|----------------|-------------|-----------|
| Yes            | 11,76%      | 2         |
| No             | 88,24%      | 29        |
|                | <b>100%</b> | <b>31</b> |

#### 3. Did/does your hospital treat patients with COVID-19?

| Answer Choices | Responses   |           |
|----------------|-------------|-----------|
| Yes            | 61,76%      | 18        |
| No             | 38,24%      | 13        |
|                | <b>100%</b> | <b>31</b> |

#### 4. Do you feel there is an underreporting or underdiagnoses of COVID-19 in your region?

| Answer Choices | Responses   |           |
|----------------|-------------|-----------|
| Yes            | 76,47%      | 25        |
| No             | 23,53%      | 6         |
|                | <b>100%</b> | <b>31</b> |

#### 5. Do you feel COVID-19 can be transmitted to the physician during endoscopy?

| Answer Choices | Responses   |           |
|----------------|-------------|-----------|
| Yes            | 97,06%      | 30        |
| No             | 2,94%       | 1         |
|                | <b>100%</b> | <b>31</b> |

#### 6. Did you triage patients differently in your center due to the pandemic?

| Answer Choices | Responses   |           |
|----------------|-------------|-----------|
| Yes            | 93,94%      | 28        |
| No             | 6,06%       | 2         |
|                | <b>100%</b> | <b>30</b> |

**7. Which kind of procedures did you continue doing? (please tick all which are applicable)**

| Answer Choices   | Responses |           |
|------------------|-----------|-----------|
| Emergency        | 87,88%    | 26        |
| Urgent           | 66,67%    | 22        |
| Elective         | 12,12%    | 4         |
| All of the above | 15,15%    | 5         |
|                  |           | <b>30</b> |

**8. Approximately what percentage of procedures were cancelled or postponed?**

| Answer Choices | Responses   |           |
|----------------|-------------|-----------|
| No reduction   | 9,38%       | 3         |
| 25-50%         | 21,88%      | 6         |
| 50-75%         | 34,38%      | 10        |
| 75-100%        | 34,38%      | 10        |
|                | <b>100%</b> | <b>29</b> |

**9. Was there a time frame for the cancellation of procedures?**

| Answer Choices | Responses   |           |
|----------------|-------------|-----------|
| Under 4 weeks  | 12,50%      | 3         |
| Over 4 weeks   | 40,63%      | 12        |
| Indefinite     | 46,88%      | 14        |
|                | <b>100%</b> | <b>29</b> |

**10. How much did endoscopy reduce in total in your center?**

| Answer Choices               | Responses   |           |
|------------------------------|-------------|-----------|
| No reduction                 | 6,06%       | 2         |
| 25-50%                       | 27,27%      | 7         |
| 50-75%                       | 30,30%      | 10        |
| 75-100% (Stopped completely) | 36,36%      | 11        |
|                              | <b>100%</b> | <b>30</b> |

**11. Did you prescreen patients during the pandemic?**

| Answer Choices | Responses |    |
|----------------|-----------|----|
| Yes            | 83,33%    | 22 |
| No             | 16,67%    | 5  |

**12. If you did prescreen patients, how was this carried out? - multiple answers possible**

| Answer Choices        | Responses |           |
|-----------------------|-----------|-----------|
| Questions and history | 88,89%    | 22        |
| Clinical exam         | 33,33%    | 9         |
| Temperature check     | 85,19%    | 22        |
| PCR-test              | 14,81%    | 3         |
| Chest x-ray           | 11,11%    | 3         |
|                       |           | <b>24</b> |

**13. Did your PPE regulations change during the pandemic?**

| Answer Choices | Responses   |           |
|----------------|-------------|-----------|
| Yes            | 96,67%      | 26        |
| No             | 3,33%       | 1         |
|                | <b>100%</b> | <b>27</b> |

**14. What PPE is available in your center for scoping of confirmed or suspected COVID-19? (Please tick all which are applicable)**

| Answer Choices                    | Responses |           |
|-----------------------------------|-----------|-----------|
| Surgical mask                     | 60,71%    | 14        |
| N95/FFP2-3 respirator             | 85,71%    | 21        |
| Gloves, single pair               | 35,71%    | 7         |
| Gloves, double pair               | 67,86%    | 16        |
| Hairnet                           | 60,71%    | 14        |
| Goggles or face-shield            | 82,14%    | 20        |
| Long-sleeved water-resistant gown | 57,14%    | 13        |
|                                   |           | <b>25</b> |

**15. For which patients did you change your PPE during the pandemic?**

| Answer Choices               | Responses   |           |
|------------------------------|-------------|-----------|
| For all patients             | 82,14%      | 30        |
| For confirmed COVID patients | 3,57%       | 1         |
| For suspected COVID patients | 14,29%      | 4         |
|                              | <b>100%</b> | <b>25</b> |

**16. Were family members allowed access into the endoscopy unit during the pandemic?**

| Answer Choices | Responses   |           |
|----------------|-------------|-----------|
| Yes            | 20,00%      | 6         |
| No             | 80,00%      | 21        |
|                | <b>100%</b> | <b>27</b> |

**17. What was the most limited PPE during the pandemic? (please tick all which are applicable)**

| Answer Choices                    | Responses       |           |
|-----------------------------------|-----------------|-----------|
| Surgical mask                     | 17,24%          | 5         |
| N95/FFP2-3 respirator             | 82,76%          | 21        |
| Gloves, single pair               | 13,79%          | 4         |
| Gloves, double pair               | 6,90%           | 2         |
| Hairnet                           | 13,79%          | 4         |
| Goggles or face-shield            | 27,59%          | 8         |
| Long-sleeved water-resistant gown | 51,72%          | 14        |
|                                   | <b>Answered</b> | <b>26</b> |

**18. Did you reuse PPE?**

| Answer Choices | Responses   |           |
|----------------|-------------|-----------|
| Yes            | 43,33%      | 14        |
| No             | 56,67%      | 15        |
|                | <b>100%</b> | <b>27</b> |

**19. Does your endoscopy unit have a negative-pressure room for scoping of COVID cases?**

| Answer Choices | Responses   |           |
|----------------|-------------|-----------|
| Yes            | 10,00%      | 2         |
| No             | 90,00%      | 25        |
|                | <b>100%</b> | <b>27</b> |

**20. Did your center dedicate a specific area for scoping of confirmed or suspected COVID cases?**

| Answer Choices | Responses   |           |
|----------------|-------------|-----------|
| Yes            | 24,14%      | 5         |
| No             | 75,86%      | 21        |
|                | <b>100%</b> | <b>26</b> |

**21. Did you change your disinfection or cleaning protocol during the pandemic?**

| Answer Choices | Responses   |           |
|----------------|-------------|-----------|
| Yes            | 23,33%      | 6         |
| No             | 76,67%      | 22        |
|                | <b>100%</b> | <b>28</b> |

**22. Has there been any change in protection of cleaning personnel during the pandemic?**

| Answer Choices | Responses   |           |
|----------------|-------------|-----------|
| Yes            | 67,86%      | 17        |
| No             | 32,14%      | 8         |
|                | <b>100%</b> | <b>25</b> |

**23. Is your center already considering changing back to normalcy due to reduction in COVID infections?**

| Answer Choices | Responses   |           |
|----------------|-------------|-----------|
| Yes            | 56,00%      | 12        |
| No             | 44,00%      | 11        |
|                | <b>100%</b> | <b>23</b> |

**24. Do you have a return-to-normal strategy?**

| Answer Choices | Responses   |           |
|----------------|-------------|-----------|
| Yes            | 42,31%      | 9         |
| No             | 57,69%      | 14        |
|                | <b>100%</b> | <b>23</b> |

**25. If you have one, what is your return to normal strategy?**

| Answer Choices                                                                        | Responses   |           |
|---------------------------------------------------------------------------------------|-------------|-----------|
| No change, because COVID did not affect our centre                                    | 0,00%       | 0         |
| Continue with our present COVID strategy                                              | 11,76%      | 2         |
| Return to normal but with surgical masks for all procedures                           | 47,06%      | 8         |
| Return to normal but with prescreening procedures and risk stratification of patients | 64,71%      | 9         |
| Other (please specify)                                                                | 5,88%       | 1         |
|                                                                                       | <b>100%</b> | <b>15</b> |

**II. Responses of participants from Australia, Denmark and Germany**

**1. Before the COVID pandemic, what was the total number of patients scoped in your centre per month?**

**Australia >300**

**Denmark >300**

**Germany >300**

**2. Have you scoped patients with confirmed or suspected COVID-19?**

|                  |    |
|------------------|----|
| <b>Australia</b> | No |
|------------------|----|

|                |     |
|----------------|-----|
| <b>Denmark</b> | Yes |
| <b>Germany</b> | Yes |

**3. Did/does your hospital treat patients with COVID-19?**

|                  |     |
|------------------|-----|
| <b>Australia</b> | Yes |
| <b>Denmark</b>   | Yes |
| <b>Germany</b>   | Yes |

**4. Do you feel there is an underreporting or underdiagnoses of COVID-19 in your region?**

|                  |     |
|------------------|-----|
| <b>Australia</b> | No  |
| <b>Denmark</b>   | Yes |
| <b>Germany</b>   | No  |

**5. Do you feel COVID-19 can be transmitted to the physician during endoscopy?**

|                  |     |
|------------------|-----|
| <b>Australia</b> | Yes |
| <b>Denmark</b>   | Yes |
| <b>Germany</b>   | Yes |

**6. Did you triage patients differently in your center due to the pandemic?**

|                  |     |
|------------------|-----|
| <b>Australia</b> | Yes |
| <b>Denmark</b>   | Yes |
| <b>Germany</b>   | Yes |

**7. Which kind of procedures did you continue doing? (please tick all which are applicable)**

|                  |                   |
|------------------|-------------------|
| <b>Australia</b> | Emergency, Urgent |
| <b>Denmark</b>   | Emergency, Urgent |
| <b>Germany</b>   | Emergency, Urgent |

**8. Approximately what percentage of procedures were cancelled or postponed?**

|                  |         |
|------------------|---------|
| <b>Australia</b> | 75-100% |
| <b>Denmark</b>   | 50-75%  |
| <b>Germany</b>   | 25-50%  |

**9. Was there a time frame for the cancellation of procedures?**

|                  |               |
|------------------|---------------|
| <b>Australia</b> | Under 4 weeks |
| <b>Denmark</b>   | Indefinite    |
| <b>Germany</b>   | Over 4 weeks  |

**10. How much did endoscopy reduce in total in your center?**

|                  |                              |
|------------------|------------------------------|
| <b>Australia</b> | 75-100% (Stopped completely) |
| <b>Denmark</b>   | 25-50%                       |
| <b>Germany</b>   | 25-50%                       |



**11. Did you prescreen patients during the pandemic?**

|           |     |
|-----------|-----|
| Australia | Yes |
| Denmark   | Yes |
| Germany   | Yes |

**12. If you did prescreen patients, how was this carried out? - multiple answers possible**

|           |                                          |
|-----------|------------------------------------------|
| Australia | Questions and history; temperature check |
| Denmark   | PCR-Test                                 |
| Germany   | Questions and history; temperature check |

**13. Did your PPE regulations change during the pandemic?**

|           |     |
|-----------|-----|
| Australia | Yes |
| Denmark   | Yes |
| Germany   | Yes |

**14. What PPE is available in your center for scoping of confirmed or suspected COVID-19? (Please tick all which are applicable)**

|           |     |
|-----------|-----|
| Australia | All |
| Denmark   | All |
| Germany   | All |

**15. For which patients did you change your PPE during the pandemic?**

|           |                  |
|-----------|------------------|
| Australia | For all patients |
| Denmark   | For all patients |
| Germany   | For all patients |

**16. Were family members allowed access into the endoscopy unit during the pandemic?**

|           |    |
|-----------|----|
| Australia | No |
| Denmark   | No |
| Germany   | No |

**17. What was the most limited PPE during the pandemic? (please tick all which are applicable)**

|           |                                           |
|-----------|-------------------------------------------|
| Australia | N95/FFP2-3 respirator                     |
| Denmark   | N95/FFP2-3 respirator                     |
| Germany   | N95/FFP2-3 respirator; water resist. gown |

**18. Did you reuse PPE?**

|           |    |
|-----------|----|
| Australia | No |
|-----------|----|

|                |     |
|----------------|-----|
| <b>Denmark</b> | No  |
| <b>Germany</b> | Yes |

**19. Does your endoscopy unit have a negative-pressure room for scoping of COVID cases?**

|                  |     |
|------------------|-----|
| <b>Australia</b> | No  |
| <b>Denmark</b>   | No  |
| <b>Germany</b>   | Yes |

**20. Did your center dedicate a specific area for scoping of confirmed or suspected COVID cases?**

|                  |     |
|------------------|-----|
| <b>Australia</b> | Yes |
| <b>Denmark</b>   | No  |
| <b>Germany</b>   | Yes |

**21. Did you change your disinfection or cleaning protocol during the pandemic?**

|                  |     |
|------------------|-----|
| <b>Australia</b> | No  |
| <b>Denmark</b>   | No  |
| <b>Germany</b>   | Yes |

**22. Has there been any change in protection of cleaning personnel during the pandemic?**

|                  |     |
|------------------|-----|
| <b>Australia</b> | Yes |
| <b>Denmark</b>   | No  |
| <b>Germany</b>   | Yes |

**23. Is your center already considering changing back to normalcy due to reduction in COVID infections?**

|                  |     |
|------------------|-----|
| <b>Australia</b> | Yes |
| <b>Denmark</b>   |     |
| <b>Germany</b>   | Yes |

**24. Do you have a return-to-normal strategy?**

|                  |     |
|------------------|-----|
| <b>Australia</b> | Yes |
| <b>Denmark</b>   | No  |
| <b>Germany</b>   | Yes |

**25. If you have one, what is your return to normal strategy?**

|                  |                                                                                                                                                    |
|------------------|----------------------------------------------------------------------------------------------------------------------------------------------------|
| <b>Australia</b> | Return to normal but with surgical masks for all procedures; Return to normal but with prescreening procedures and risk stratification of patients |
| <b>Denmark</b>   | -                                                                                                                                                  |

|                |                                                                                                                                                    |
|----------------|----------------------------------------------------------------------------------------------------------------------------------------------------|
| <b>Germany</b> | Return to normal but with surgical masks for all procedures; Return to normal but with prescreening procedures and risk stratification of patients |
|----------------|----------------------------------------------------------------------------------------------------------------------------------------------------|
